# Supplementary material for: Self-assemblies of TTF derivatives programmed by alkyl chains and functional groups
Source: Royal Society of Chemistry journal article supplement (doi:10.1039/c7cp08201k), 2018-01-01
Supplement: c7cp08201k1.pdf [file c7cp08201k1.pdf]

# Self-Assemblies of TTF Derivatives Programmed by Alkyl Chain and Functional Group

Xiao-yang Zhu<sup>a,b†</sup>, Bin Tu<sup>b†</sup>, Guo-jun Hu<sup>c</sup>, Qiao-jun Fang<sup>b</sup>, Jun-jie Qi<sup>a\*</sup>, Xun-wen Xiao<sup>c\*</sup>, Yan-fang  
Geng<sup>b\*</sup> and Qing-dao Zeng<sup>b\*</sup>

<sup>a</sup> School of Materials Science and Engineering, University of Science and Technology Beijing, Beijing 100083, China. E-mail: junjieqi@ustb.edu.cn

<sup>b</sup> CAS Key Laboratory of Standardization and Measurement for Nanotechnology, CAS Center for Excellence in Nanoscience, National Center for Nanoscience and Technology (NCNST), 11 Zhongguancun Beiyitiao, Beijing 100190, China. E-mail: zengqd@nanoctr.cn, gengyf@nanoctr.cn

<sup>c</sup> College of Chemical Engineering, Ningbo University of Technology, Ningbo 315211, P. R. China. E-mail: xunwenxiao@nbut.edu.cn

<sup>†</sup> These authors contributed equally to this work.

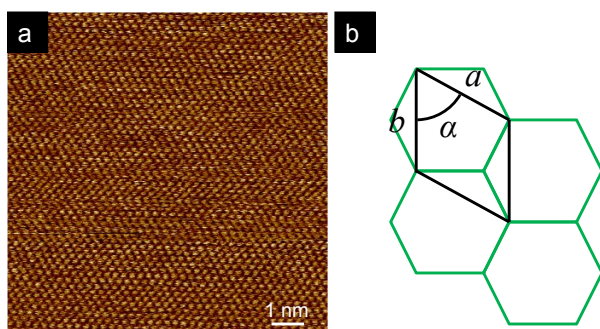

**Figure S1.** (a) Observed STM image of HOPG at a scanning condition ( $I_{\text{set}} = 600$  pA,  $V_{\text{bias}} = 10$  mV). (b) Illustration of the graphite lattice.
